# Supplementary material for: One-step preparation of graphene oxide–poly(3,4 ethylenedioxythiophene) composite films for nonvolatile rewritable memory devices
Source: Royal Society of Chemistry journal article supplement (doi:10.1039/c5ra25517a), 2016-01-01
Supplement: c5ra25517a1.pdf [file c5ra25517a1.pdf]

## **Supporting Information**

### **One-step preparation of graphene oxide- poly(3,4ethylenedioxythiophene) composite films for nonvolatile rewritable memory**

Yongming Li and Xiuyuan Ni \*

State Key Laboratory of Molecular Engineering of Polymers, Department of Macromolecular  
Science, FudanUniversity, Shanghai, 200433, The People's Republic of China

Tel: +86-21-65640982; Fax: +86-21-65640293

E-mail: xyni@fudan.edu.cn;

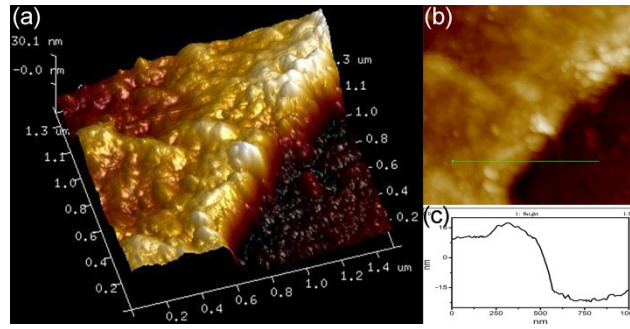

**Fig. S1** (a) The AFM 3D height image of GO-PEDOT composite films on ITO substrate. (b) The AFM 2D height image of GO-PEDOT composite films on ITO substrate. (c) The height profile which is taken along the green line in (b). It is measured that the thickness of the GO-PEDOT composite films is about 35 nm.

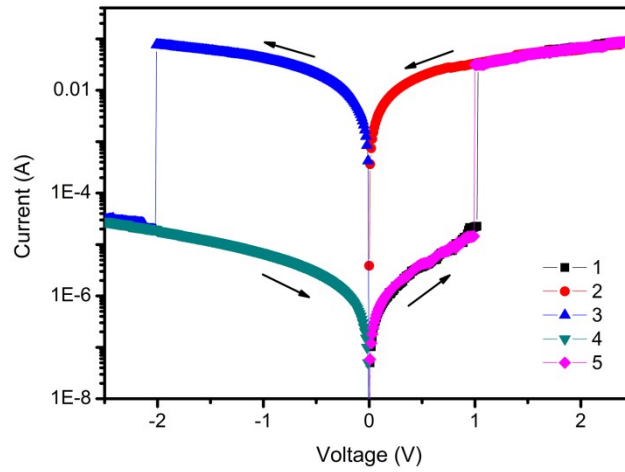

**Fig. S2** The I-V characteristics of the ITO/GO-PEDOT/Al device under vacuum. The result shows that the ON/OFF current ratio of the device under vacuum is  $7 \times 10^3$  at 0.3 V and the turn-on voltage is 1 V.
